# Supplementary material
Source: PubMed Central journal article supplement (PMC7332894)
Supplement: bloodBLD2019003312-suppl1.pdf [file bloodBLD2019003312-suppl1.pdf]

## Supplemental Data for

### **E2A-PBX1 functions as a coactivator for RUNX1 in acute lymphoblastic leukemia**

Wen-Chieh Pi<sup>1,2</sup>, Jun Wang<sup>3,4</sup>, Miho Shimada<sup>5</sup>, Jia-Wei Lin<sup>6</sup>, Huimin Geng<sup>7</sup>, Yu-Ling Lee<sup>5</sup>, Dongxu Li<sup>3,4</sup>, Gang Greg Wang<sup>3,4</sup>, Robert G. Roeder<sup>5\*</sup>, and Wei-Yi Chen<sup>1,2,8\*</sup>

<sup>1</sup>Institute of Biochemistry and Molecular Biology and <sup>2</sup>Biomedical Industry Ph.D. Program, National Yang-Ming University, Taipei 112, Taiwan

<sup>3</sup>Lineberger Comprehensive Cancer Center, <sup>4</sup>Department of Biochemistry and Biophysics, University of North Carolina at Chapel Hill School of Medicine, Chapel Hill, NC 27599, USA

<sup>5</sup>Laboratory of Biochemistry and Molecular Biology, The Rockefeller University, New York, NY 10065, USA

<sup>6</sup>Department of Medicine, National Yang-Ming University, Taipei 112, Taiwan

<sup>7</sup>Laboratory Medicine, UCSF School of Medicine, San Francisco, CA, 94143, USA

<sup>8</sup>Cancer Progression Research Center, National Yang-Ming University, Taipei 112, Taiwan

\*Correspondence: chenwy@ym.edu.tw; roeder@rockefeller.edu

## Table of Contents of Supplemental Data

**Supplemental Figure S1.** E2A and E2A-PBX1 are separately enriched by the indicated antibodies.

**Supplemental Figure S2.** The sequence alignment and protein levels of PBXs in 697 pre-B ALL.

**Supplemental Figure S3.** Immune response signaling and hematopoietic pathways are enriched in RUNX1/EP1-hf co-occupied locus.

**Supplemental Figure S4.** The expression levels of putative E2A targets are slightly decreased in E2A/E2A-PBX1 and RUNX1-depleted 697 lines.

**Supplemental Figure S5.** RUNX1 and E2A-PBX1 are efficiently depleted by shRNA-treatment in 697 and RCH-ACV lines.

**Supplemental Methods.**

**Supplemental References.**

**Supplemental Table S1.** shRNA clone ID

**Supplemental Table S2.** RT-QPCR and ChIP-QPCR primers

**Supplemental Table S3.** Antibody list

**Supplemental Table S4.** Summary of the detailed information for ChIP-seq experiments

**Supplemental Table S5.** Summary of the detailed information for RNA-seq experiments

**Supplemental Table S6.** Complete output of Homer motif analysis.

**Supplemental Dataset:**

**Supplemental Dataset\_1.** ChIP-seq identified peaks.

**Supplemental Dataset\_2.** RNA-seq identified differentially expressed genes upon shRNA treatments.

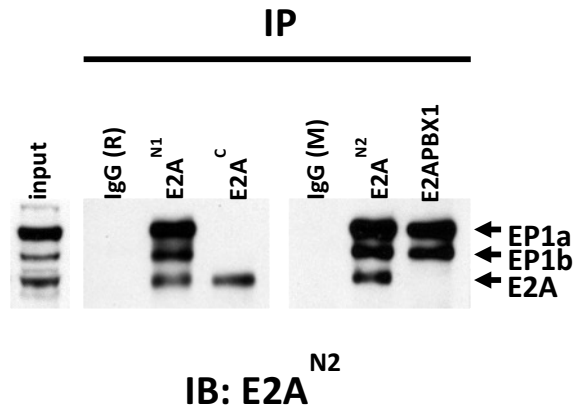

**Supplemental Figure S1. E2A and E2A-PBX1 are separately enriched by the indicated antibodies.** Immunoprecipitation (IP) assays with cell lysate from the E2A-PBX1+ 697 cell line were carried out with antibodies against the E2A N-terminus (E2A<sup>N1</sup> and E2A<sup>N2</sup>), the E2A C-terminus (E2A<sup>C</sup>) and the E2A-PBX1 fusion junction (E2APBX1). Immunoblotting with anti-E2A<sup>N2</sup> antibody validates the specificity of the antibodies. Normal IgGs from rabbit, IgG(R), and mouse, IgG(M), were used as IP control antibodies.



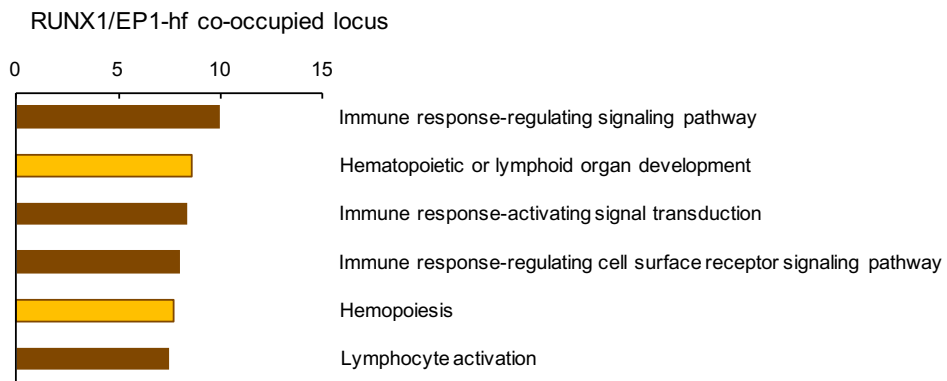

**Supplemental Figure S3. Immune response signaling and hematopoietic pathways are enriched in RUNX1/EP1-hf co-occupied locus.**

GREAT analysis identifies the indicated GO biological processes for the RUNX1/EP1-hf co-bound genomic loci.

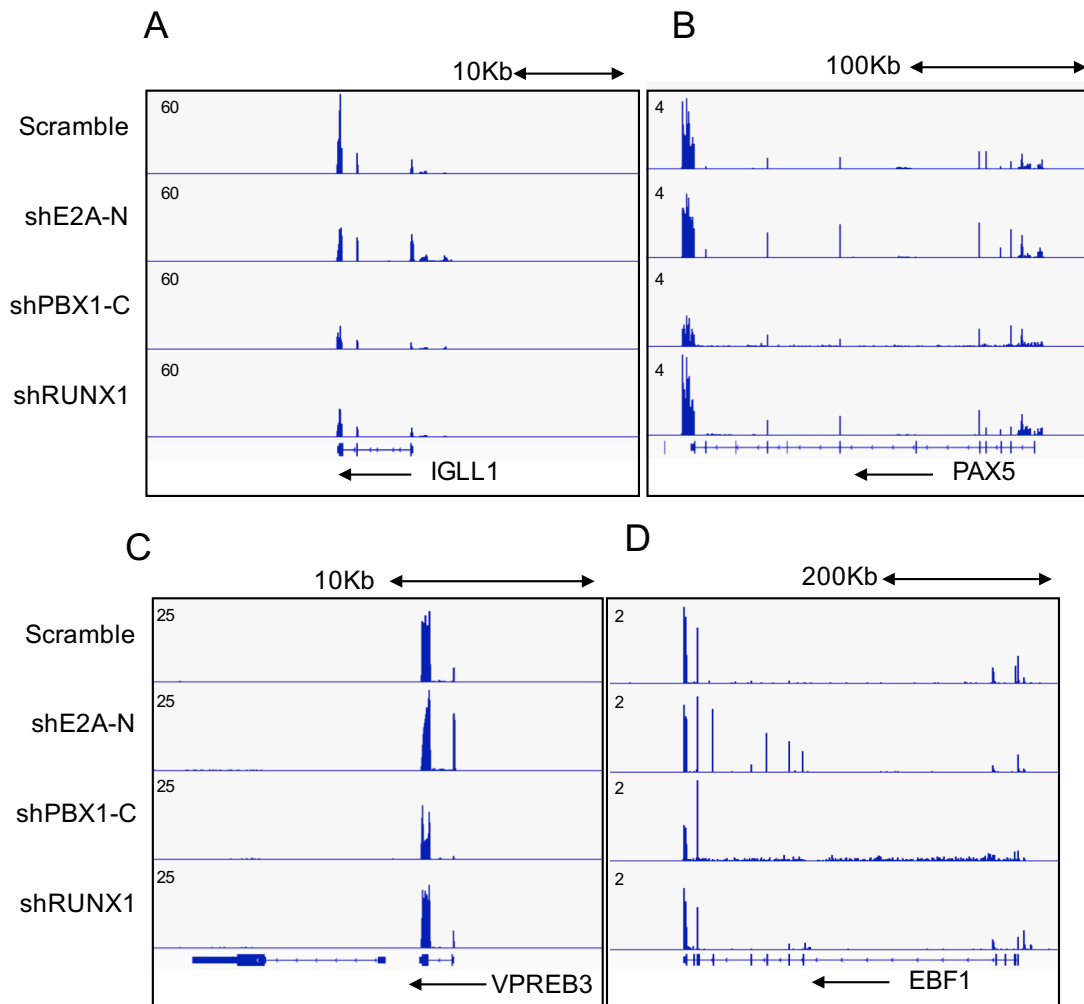

**Supplemental Figure S4. The expression levels of putative E2A targets are slightly decreased in E2A/E2A-PBX1 and RUNX1-depleted 697 lines. RNA-seq signals of *IGLL1* (A), *PAX5* (B), *VPREB3* (C), and *EBF1* (D) gene loci in 697 cell line treated with indicated shRNAs.**

**A**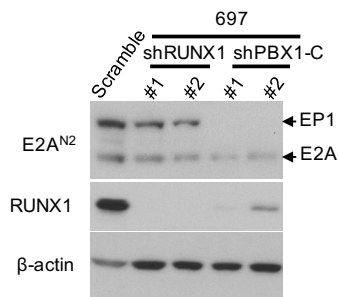**B**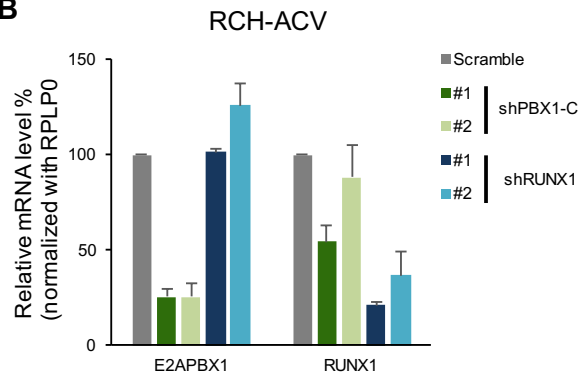

**Supplemental Figure S5. RUNX1 and E2A-PBX1 are efficiently depleted by shRNA-treatment in 697 and RCH-ACV cell lines.**

(A) Immunoblot of E2A, E2A-PBX1, and RUNX1 in 697 cell line treated with shRUNX1 and shPBX1-C. Actin as the gel loading control.

(B) RT-qPCR-determined mRNA levels of E2A-PBX1 and RUNX1 in RCH-ACV line transduced with indicated shRNAs. Data of three independent experiments are plotted as mean  $\pm$  sd after normalization to *RPLP0* levels and relative to those of shScr.

## Supplemental Methods

### Cell culture

HEK293 and HEK293T cell lines were maintained at 37°C in DMEM (Dulbecco's Modified Eagle Medium) supplemented with 10% fetal bovine serum (FBS), 100 U/mL penicillin, and 100 µg/mL streptomycin. Human pre-B leukemia lines 697 (DSMZ ACC 42), RCH-ACV (DSMZ AC-548) were grown at 37°C in RPMI 1640 supplemented with 10% FBS and 100 U/mL penicillin, 100 µg/mL streptomycin. The lines with doxycycline-inducible stable expression of E2A-HA-FLAG, designated 697(E2A-hf), or E2A-PBX1-HA-FLAG, designated 697(EP1-hf), were established as previously described<sup>1</sup>. Positive clones were screening by immunoblotting with anti-FLAG antibody 24 hr post-induction with 1 µg/mL Doxycycline. Authentication of identities of parental and derived cell lines was ensured by the genetic signature profiling and fingerprinting analysis as recommended<sup>2</sup>. Every month, a routine examination of cell lines in culture for any possible mycoplasma contamination was performed using commercially available detection kits (Lonza). Cells with less than of 10 times of passages were used in the study.

### Recombinant proteins and pull-down assays

Full length cDNAs for E2A-PBX1, E2A, PBX, RUNX1, and EBF1 were cloned in-frame to an N-terminal FLAG or HA tag into *pFastBac* vector (Thermo Scientific). Baculovirus-mediated protein expression was performed in High Five™ cells according to manufacturer's instruction. Expressed proteins were immunopurified by anti-FLAG M2 or anti-HA beads and subjected to pull-down assay as previously described<sup>3</sup>. Briefly, 0.2 µg recombinant proteins (each) were incubated in 500 µL BC300 buffer supplemented with 0.2% Triton-X 100 and 0.1% BSA at 4°C for 2 hr followed by immunoprecipitation with indicated antibodies and protein A agarose. GST and GST-tagged PBX1<sup>C</sup> [PBX1<sup>C</sup> (484-852), FD (563-713), DM-IH (563-626), IH-HD (601-690), and HCM (691-713)] proteins



were expressed in bacterial from pGEX6P1 vectors and purified using glutathione magnetic agarose beads (Pierce). For GST pull-down assays, GST proteins were immobilized on glutathione beads and followed by incubation with purified RUNX1 protein (0.2 µg) in BC100 buffer containing 0.2% Triton-X 100 and 0.1% BSA at 4°C for 2 hr. Precipitated protein complexes were analyzed by gel electrophoresis and stained with Coomassie brilliant blue or immunoblotting with indicated antibodies.

### **shRNA knockdown**

Lentiviruses were prepared in HEK-293T cells according to a standard protocol from Addgene. For knockdown (KD), cells were infected with shRNA lentivirus plus 8 µg/mL polybrene in complete medium for 24 hr. After selection with 2 µg/mL puromycin for 48 hr, transduced cells were subjected to proliferation and colony -formation unit (CFU) assays or used for RNA extraction and cell lysate preparation. For cell proliferation assay, 1,000,000 cells/mL were plated in triplicate in 24-well plate at post-infection 96 hr. After incubation for 48 hr (post-infection 144 hr), cells were stained with trypan blue and viable cells were counted. For CFU assays of 697 line, 5,000 cells/mL cells were plated in triplicate in 12-well plate that contain a complete methylcellulose-based medium (MethoCult™ GF H4434; Stem Cell Technologies Inc.) supplemented with 20% FBS. After incubation at 37°C for 21 days, visible colonies (> 100 µm) were counted and imaged by a light microscope.

### **RT-qPCR**

The quantitative RT-PCR was carried out as previously described<sup>1</sup>. In brief, total RNAs were isolated using a Quick-RNA™ MiniPrep Plus kit (Zymo Research) and cDNAs were synthesized with 1 µg of total RNA using RevertAid RT Reverse Transcription Kit (Thermo Scientific) according to the manufacturer's instructions. Quantitative PCR used SYBR green master mix (KAPA SYBR FAST qPCR Master Mix

ABI Prism, KM4102) was run in triplicate on an ABI StepOne Plus real time PCR system (ABI). The gene-specific primers used for RT-qPCR are listed in Supplemental Table S2.

### **Bone marrow transformation, Colony-formation unit (CFU) assay**

E2A-PBX1 (WT or mutant) was cloned into MSCV-based retroviral vectors, and retroviruses was prepared according to manufacturer's instructions (Clontech Laboratories, Inc.). Murine bone marrow cells were isolated and subject to lineage-negative enrichment (Miltenyi Bio). The HSPC stimulation, retroviral infection and assays for out-growth and immortalization were performed as described before<sup>4-6</sup>. The CFU assays were conducted in as previously described<sup>5,6</sup>. In brief, 5,000 infected cells were plated in triplicate in 6-well plates containing the complete growth medium supplemented with 0.5% soft agar at bottom and layered with 0.3% soft agar and 1 mL of medium. Colonies were stained with idonitritetrazolium chloride and directly counted under a light microscope.

### **Co-immunoprecipitation (CoIP) assay**

HEK293T cells were co-transfected with pEF1 $\alpha$ -E2A-PBX1 and pIRES-RUNX1 or pIRES-EBF1 vectors. At 24hr post-transfection, cell lysates were prepared in BC150 lysis buffer (50 mM Tris-HCl pH 7.9, 150 mM NaCl, 0.2% Triton-X 100) containing protease inhibitor cocktail (Roche). Proteins were immunoprecipitated by indicated resins and subjected to gel electrophoresis followed by immunoblotting assay.

### **ChIP assay**

Briefly, 697 or doxycycline-treated stable 697 cells were cross-linked with 1% formaldehyde, quenched by 0.125 M glycine, and lysed in FA lysis buffer (50mM HEPES-KOH pH 7.5, NaCl, Triton-X 100, 0.1%SDS) supplemented with protease inhibitor cocktail. Chromatin was fragmented by a Covaris (S220) Sonicator and immunoprecipitated with indicated antibodies. Precipitated DNAs were purified by PCR

purification kit (Qiagen). Quantitative PCR used QuantiNova Probe PCR kit (Qiagen 208052) in a StepOnePlus™ System (Applied Biosystems) with gene-specific primers (listed in Supplemental Table S2). The  $\Delta$ Ct method was used to quantify the signals and normalized to the  $\Delta$ Ct values of indicated house-keeping genes.

### **ChIP-seq and RNA-seq analysis**

ChIP-seq and RNA-seq in 697 line were executed as previously described<sup>1</sup>. For data analysis, raw image data were converted into base calls and fastq files via the Illumina pipeline CASAVA version 1.8 with default parameters. For ChIP-seq analysis, 50-base reads were aligned to HG19 human genome using Bowtie software<sup>7</sup> with parameters "-n 2 -m 1 -l 36 --best". ChIP-seq peak calling was performed using MACS2 (1.4.0rc2) software<sup>8</sup> and identified peaks are listed in Supplemental Dataset\_1. The bedtools intersect command<sup>9</sup> was used to identify overlapping peaks between indicated ChIP-seq profilings. For RNA-seq analysis, 50-base reads were mapped to HG19 human genome using TopHat<sup>10</sup> with the default parameters. The expression level for gene/transcript was quantified using the analyzeRepeats.pl command of Homer software<sup>11</sup> with default parameters (-strand both -count exons) and differential gene expression was analyzed using getDiffExpression.pl command. The quantified gene/transcripts level are represented as RPKM (reads per kilobase of transcripts per million fragments mapped) and listed in Supplemental Dataset\_2.

## Supplemental References

1. Shimada M, Chen WY, Nakadai T, et al. Gene-Specific H1 Eviction through a Transcriptional Activator-->p300-->NAP1-->H1 Pathway. *Mol Cell*. 2019;74:268-283 e265.
2. Yu M, Selvaraj SK, Liang-Chu MM, et al. A resource for cell line authentication, annotation and quality control. *Nature*. 2015;520(7547):307-311.
3. Chen WY, Zhang J, Geng H, Du Z, Nakadai T, Roeder RG. A TAF4 coactivator function for E proteins that involves enhanced TFIID binding. *Genes Dev*. 2013;27:1596-1609.
4. Wang GG, Song J, Wang Z, et al. Haematopoietic malignancies caused by dysregulation of a chromatin-binding PHD finger. *Nature*. 2009;459:847-851.
5. Xu B, On DM, Ma A, et al. Selective inhibition of EZH2 and EZH1 enzymatic activity by a small molecule suppresses MLL-rearranged leukemia. *Blood*. 2015;125:346-357.
6. Lu R, Wang P, Parton T, et al. Epigenetic Perturbations by Arg882-Mutated DNMT3A Potentiate Aberrant Stem Cell Gene-Expression Program and Acute Leukemia Development. *Cancer Cell*. 2016;30:92-107.
7. Langmead B, Salzberg SL. Fast gapped-read alignment with Bowtie 2. *Nat Methods*. 2012;9:357-359.
8. Zhang Y, Liu T, Meyer CA, et al. Model-based analysis of ChIP-Seq (MACS). *Genome Biol*. 2008;9:R137.
9. Quinlan AR, Hall IM. BEDTools: a flexible suite of utilities for comparing genomic features. *Bioinformatics*. 2010;26:841-842.
10. Trapnell C, Pachter L, Salzberg SL. TopHat: discovering splice junctions with RNA-Seq. *Bioinformatics*. 2009;25:1105-1111.
11. Heinz S, Benner C, Spann N, et al. Simple combinations of lineage-determining transcription factors prime cis-regulatory elements required for macrophage and B cell identities. *Mol Cell*. 2010;38:576-589.

**Supplemental Table S1. shRNA clone ID**

| <b>Gene symbol</b> | <b>NM ID</b> | <b>Clone ID</b>    |
|--------------------|--------------|--------------------|
| TCF3/E2A           | NM_003200    | #1, TRCN0000017535 |
|                    |              | #2, TRCN0000017534 |
| PBX1               | NM_002585    | #1, TRCN0000274137 |
|                    |              | #2, TRCN0000274085 |
| RUNX1              | NM_001754    | #1, TRCN0000338490 |
|                    |              | #2, TRCN0000338427 |
| mRunx1             | NM_009821    | #1, TRCN0000084812 |
|                    |              | #2, TRCN0000229574 |

**Supplemental Table S2. RT-qPCR and ChIP-qPCR primers**

**RT-qPCR**

|                 | <b>Forward</b>                | <b>Reverse</b>         |
|-----------------|-------------------------------|------------------------|
| <i>EPHA3</i>    | GGACTACGAGGTCAAATACTATGA<br>A | GTGCCTCTTGCCCTCAGAAT   |
| <i>MPP7</i>     | GCTGCCTCCTTGCCTCC             | GCAGCCACGTTGTCTACCAA   |
| <i>KCNJ2</i>    | CTTACATGCCTCTGTACCCCC         | CTGGGAGCCTTGTGGTTCTA   |
| <i>TRIM13</i>   | CACTAGCCGGAGTAGCCTCT          | TTCTTCAAGCAGCTCCATCACA |
| <i>CXorf21</i>  | AGCTTCTGGAGGATTGAAGAGT        | GCACAACCTCCAGTGGATGTCA |
| <i>RUNX1</i>    | AAATGCTACCGCAGCCATGA          | CTGTGGTAGGTGGCGACTTG   |
| <i>E2A-PBX1</i> | CCAGCCTCATGCACAACCA           | GGGCTCCTCGGATACTCAAAA  |
| <i>RPLP0</i>    | CACCATTGAAATCCTGAGTGATGT      | TGACCAGCCCAAAGGAGAAG   |

**ChIP-qPCR**

|                  | <b>Forward</b>        | <b>Reverse</b>          |
|------------------|-----------------------|-------------------------|
| <i>EPHA3</i>     | TTAGCACAAAGCAGAGCCGT  | TTTCCTTTGCACCAACGAG     |
| <i>MPP7</i>      | GCTTGTGGTTCAGAACGCCT  | AGGCGTAAAGTCTCCATGAGG   |
| <i>KCNJ2</i>     | GGGAGTTAACCTCCTTGGTCC | AGGGCTACAAGTAGAGCGAGG   |
| <i>TRIM13</i>    | CAGTTGTTGCCTCCAAACGG  | TCGGGGTTTTGGTGACTIONAG  |
| <i>CXorf21</i>   | TCAGGATGTCGTGGTCAAGTC | CCATGATTTTTCCGGTGCCC    |
| <i>RUNX1_IGR</i> | CTCCTTAAGAGGTGGGCTGTC | AGGGCCGGTCTCATCACTA     |
| <i>RUNX1_EN</i>  | AGTCGAAGCGACTGTTGGTTT | AACAACCTGTGCAATGGTTCTGA |
| <i>RPL30</i>     | AACACCACAATCGCTACCGT  | AAGAGACTGAACGGGCTTCG    |
| <i>GAPDH</i>     | TACTAGCGGTTTACGGGCG   | TCGACAGGAGGAGCAGAGAGCGA |
| <i>NCAPD2</i>    | ATGGTTGCCACTGGGGATCT  | TGCCAAAGCCTAGGGGAAGA    |

**Supplemental Table S3. Antibody list**

|                                   |                        |
|-----------------------------------|------------------------|
| anti-E2A (E2A <sup>N1</sup> )     | this study             |
| anti-E2A (E2A <sup>N2</sup> )     | Santa Cruz, sc-416     |
| anti-PBX1/2/3 (PBX <sup>C</sup> ) | Santa Cruz, sc-888     |
| anti-E2A-PBX1                     | BD Biosciences, 556021 |
| anti-p300                         | Santa Cruz, sc-585     |
| anti-RUNX1                        | Abcam, ab23980         |
| anti-H3K27ac                      | Abcam, ab4729          |
| anti-MED1                         | Bethyl, A300-793A      |
| anti-FLAG                         | Sigma, F1804           |
| anti-FLAG agarose                 | Sigma, A2220           |
| anti-HA tag                       | Abcam, ab9110          |
| anti- $\beta$ -Actin              | Sigma, A2228           |

**Supplementary Table S4:** Summary of number of reads and peaks detected in ChIP-seq experiments

| ChIP-seq experiment      | Total reads | Uniquely aligned reads | Number of peaks detected         |                           | Mapping Efficiency (%) |
|--------------------------|-------------|------------------------|----------------------------------|---------------------------|------------------------|
|                          |             |                        | P <sup>c</sup> ≤10 <sup>-5</sup> | P≤10 <sup>-9</sup>        |                        |
| input 697 <sup>a</sup>   | 38,341,191  | 21,436,723             |                                  |                           | 56                     |
| input 697HF <sup>b</sup> | 34,281,257  | 27,365,815             |                                  |                           | 80                     |
| HA-Ctrl 697HF            | 34,890,188  | 28,349,401             |                                  |                           | 81                     |
| E2A <sup>N1</sup> 697    | 34,906,348  | 20,508,319             | 9,575                            | 4,110                     | 59                     |
| E2A <sup>C</sup> 697     | 39,098,605  | 23,029,392             | 7,494                            | 4,144                     | 59                     |
| PBX <sup>C</sup> 697     | 45,572,361  | 27,533,200             | <u>15,681<sup>d</sup></u>        | 8,800                     | 60                     |
| E2A-hf 697HF             | 32,666,045  | 25,968,665             | <u>10,442<sup>d</sup></u>        | 5,748                     | 79                     |
| EP1-hf 697HF             | 31,875,272  | 25,176,210             | <u>9,098<sup>d</sup></u>         | 4,818                     | 79                     |
| RUNX1 697                | 36,956,521  | 30,315,686             | 45,475                           | <u>31,232<sup>d</sup></u> | 82                     |
| p300 697                 | 47,386,452  | 29,982,714             |                                  |                           | 63                     |
| H3K27ac 697              | 36,508,556  | 30,626,776             |                                  |                           | 84                     |
| MED1 697                 | 44,076,152  | 32,210,634             |                                  |                           | 73                     |

<sup>a</sup> input DNA of parental 697 line

<sup>b</sup> input DNA of stable HA-Ctrl 697HF lines

<sup>d</sup> p-value calculated by MACS peak calling program.

<sup>d</sup> peaks used for region overlapping analysis.



**Supplementary Table S5:** Summary of number of reads and alignment rate in RNA-seq experiments

| <b>RNA-seq experiment</b> | <b>Total reads</b> | <b>Uniquely aligned reads (%)<sup>a</sup></b> | <b>Aligned &gt; 1 times (%)<sup>a</sup></b> | <b>Overall alignment rate (%)<sup>a</sup></b> |
|---------------------------|--------------------|-----------------------------------------------|---------------------------------------------|-----------------------------------------------|
| 697_Scr_#1                | 60,829,680         | 48,028,626 (78.96)                            | 7,758,668 (12.75)                           | 91.71                                         |
| 697_Scr_#2                | 65,157,731         | 47,994,771 (73.66)                            | 12,233,741 (18.78)                          | 92.42                                         |
| 697_shE2A_N#1             | 60,620,638         | 47,521,229 (78.39)                            | 7,941,280 (13.1)                            | 91.49                                         |
| 697_shE2A_N#2             | 68,465,992         | 50,530,075 (73.80)                            | 11,757,059 (17.17)                          | 90.98                                         |
| 697_shPBX1_C#1            | 36,913,154         | 24,213,055 (65.59)                            | 11,722,164 (31.76)                          | 97.35                                         |
| 697_shPBX1_C#2            | 41,784,716         | 32,876,419 (78.68)                            | 7,678,863 (18.38)                           | 97.06                                         |
| 697_shRUNX1_#1            | 69,995,952         | 52,517,289 (75.03)                            | 11,846,971 (16.93)                          | 91.95                                         |
| 697_shRUNX1_#2            | 38,234,911         | 30,156,425 (78.87)                            | 6,977,994 (18.25)                           | 97.12                                         |

<sup>a</sup> percent total reads

## Supplemental Table S6. Complete output of Homer motif analysis.

### Homer *de novo* Motif Results (E2AHF\_motif/)

[Known Motif Enrichment Results](#)

[Gene Ontology Enrichment Results](#)

If Homer is having trouble matching a motif to a known motif, try copy/pasting the matrix file into [STAMP](#)

More information on motif finding results: [HOMER](#) | [Description of Results](#) | [Tips](#)

Total target sequences = 10442

Total background sequences = 38641

\* - possible false positive

| Rank | Motif | P-value | log P-value | % of Targets | % of Background | STD(Bg SID)      | Best Match/Details                                                                                                                         | Motif File                          |
|------|-------|---------|-------------|--------------|-----------------|------------------|--------------------------------------------------------------------------------------------------------------------------------------------|-------------------------------------|
| 1    |       | 1e-1842 | -4.242e+03  | 56.23%       | 16.54%          | 72.4bp (103.7bp) | E2A(bHLH)/proBcell-E2A-ChIP-Seq(GSE21978)/Homer(0.987)<br><a href="#">More Information</a>   <a href="#">Similar Motifs Found</a>          | <a href="#">motif file (matrix)</a> |
| 2    |       | 1e-604  | -1.392e+03  | 40.90%       | 18.62%          | 77.9bp (96.6bp)  | Erv2(ETS)/ES-ER71-ChIP-Seq(GSE59402)/Homer(0.967)(0.987)<br><a href="#">More Information</a>   <a href="#">Similar Motifs Found</a>        | <a href="#">motif file (matrix)</a> |
| 3    |       | 1e-429  | -9.879e+02  | 24.72%       | 9.71%           | 78.6bp (99.7bp)  | RUNX1(Runt)/Jurkat-RUNX1-ChIP-Seq(GSE29180)/Homer(0.969)<br><a href="#">More Information</a>   <a href="#">Similar Motifs Found</a>        | <a href="#">motif file (matrix)</a> |
| 4    |       | 1e-399  | -9.189e+02  | 20.05%       | 7.13%           | 76.3bp (96.6bp)  | EBF(EBF)/proBcell-EBF-ChIP-Seq(GSE21978)/Homer(0.942)<br><a href="#">More Information</a>   <a href="#">Similar Motifs Found</a>           | <a href="#">motif file (matrix)</a> |
| 5    |       | 1e-171  | -3.955e+02  | 44.65%       | 31.55%          | 83.9bp (96.2bp)  | MF0009.1_TRP(MYB)_class/Jaspar(0.936)<br><a href="#">More Information</a>   <a href="#">Similar Motifs Found</a>                           | <a href="#">motif file (matrix)</a> |
| 6    |       | 1e-98   | -2.274e+02  | 34.64%       | 25.33%          | 84.6bp (96.9bp)  | Foxo1(Forkhead)/RAW-Foxo1-ChIP-Seq(Fan_et_al)/Homer(0.806)<br><a href="#">More Information</a>   <a href="#">Similar Motifs Found</a>      | <a href="#">motif file (matrix)</a> |
| 7    |       | 1e-54   | -1.249e+02  | 9.84%        | 5.92%           | 82.9bp (91.2bp)  | EGR1/MA0162.2/Jaspar(0.804)<br><a href="#">More Information</a>   <a href="#">Similar Motifs Found</a>                                     | <a href="#">motif file (matrix)</a> |
| 8    |       | 1e-49   | -1.139e+02  | 26.12%       | 20.09%          | 85.5bp (97.4bp)  | NFAT5/MA0606.1/Jaspar(0.754)<br><a href="#">More Information</a>   <a href="#">Similar Motifs Found</a>                                    | <a href="#">motif file (matrix)</a> |
| 9    |       | 1e-45   | -1.052e+02  | 22.55%       | 17.10%          | 84.8bp (94.4bp)  | Fra1(bZIP)/BT549-Fra1-ChIP-Seq(GSE46166)/Homer(0.926)<br><a href="#">More Information</a>   <a href="#">Similar Motifs Found</a>           | <a href="#">motif file (matrix)</a> |
| 10   |       | 1e-43   | -1.013e+02  | 8.64%        | 5.31%           | 84.7bp (89.4bp)  | MEF2A/MA0052.3/Jaspar(0.699)<br><a href="#">More Information</a>   <a href="#">Similar Motifs Found</a>                                    | <a href="#">motif file (matrix)</a> |
| 11   |       | 1e-43   | -1.003e+02  | 3.90%        | 1.81%           | 82.0bp (100.3bp) | Unknown-ESC-element(?)mES-Nanog-ChIP-Seq(GSE11724)/Homer(0.673)<br><a href="#">More Information</a>   <a href="#">Similar Motifs Found</a> | <a href="#">motif file (matrix)</a> |
| 12   |       | 1e-37   | -8.653e+01  | 30.91%       | 25.31%          | 86.5bp (93.4bp)  | CHR(?)Hela-CellCycle-Expression/Homer(0.862)<br><a href="#">More Information</a>   <a href="#">Similar Motifs Found</a>                    | <a href="#">motif file (matrix)</a> |
| 13   |       | 1e-29   | -6.704e+01  | 4.12%        | 2.28%           | 85.4bp (98.3bp)  | ZEB1/MA0103.2/Jaspar(0.744)<br><a href="#">More Information</a>   <a href="#">Similar Motifs Found</a>                                     | <a href="#">motif file (matrix)</a> |
| 14   |       | 1e-28   | -6.449e+01  | 11.98%       | 8.76%           | 87.7bp (98.4bp)  | STAT5(Stat)/mCD4+-Stat5-ChIP-Seq(GSE12346)/Homer(0.688)<br><a href="#">More Information</a>   <a href="#">Similar Motifs Found</a>         | <a href="#">motif file (matrix)</a> |
| 15   |       | 1e-15   | -3.670e+01  | 0.50%        | 0.12%           | 94.2bp (86.7bp)  | E2A(bHLH)/proBcell-E2A-ChIP-Seq(GSE21978)/Homer(0.602)<br><a href="#">More Information</a>   <a href="#">Similar Motifs Found</a>          | <a href="#">motif file (matrix)</a> |
| 16   |       | 1e-15   | -3.581e+01  | 0.47%        | 0.11%           | 84.9bp (71.1bp)  | NeuroD1(bHLH)/Islet-NeuroD1-ChIP-Seq(GSE30298)/Homer(0.688)<br><a href="#">More Information</a>   <a href="#">Similar Motifs Found</a>     | <a href="#">motif file (matrix)</a> |
| 17   |       | 1e-14   | -3.423e+01  | 0.19%        | 0.02%           | 81.9bp (48.2bp)  | GFY(?)Promoter/Homer(0.641)<br><a href="#">More Information</a>   <a href="#">Similar Motifs Found</a>                                     | <a href="#">motif file (matrix)</a> |

|      |                                                                                   |       |            |       |       |                    |                                                                                                                                         |                                     |
|------|-----------------------------------------------------------------------------------|-------|------------|-------|-------|--------------------|-----------------------------------------------------------------------------------------------------------------------------------------|-------------------------------------|
| 18 * |  | 1e-11 | -2.688e+01 | 0.19% | 0.02% | 87.8bp<br>(40.7bp) | MYBL2/MA0777.1/Jaspar(0.732)<br><a href="#">More Information</a>   <a href="#">Similar Motifs Found</a>                                 | <a href="#">motif file (matrix)</a> |
| 19 * |  | 1e-9  | -2.126e+01 | 0.29% | 0.07% | 82.7bp<br>(73.0bp) | EGR2/MA0472.2/Jaspar(0.651)<br><a href="#">More Information</a>   <a href="#">Similar Motifs Found</a>                                  | <a href="#">motif file (matrix)</a> |
| 20 * |  | 1e-8  | -1.883e+01 | 0.09% | 0.01% | 85.7bp<br>(68.2bp) | TFCP2/MA0145.3/Jaspar(0.555)<br><a href="#">More Information</a>   <a href="#">Similar Motifs Found</a>                                 | <a href="#">motif file (matrix)</a> |
| 21 * |  | 1e-7  | -1.622e+01 | 1.43% | 0.90% | 82.1bp<br>(85.7bp) | Maz(Zf)/HepG2-Maz-ChIP-Seq(GSE31477)/Homer(0.645)<br><a href="#">More Information</a>   <a href="#">Similar Motifs Found</a>            | <a href="#">motif file (matrix)</a> |
| 22 * |  | 1e-1  | -4.390e+00 | 0.05% | 0.01% | 81.0bp<br>(77.6bp) | TEAD(TEA)/Fibroblast-PU.1-ChIP-Seq(Unpublished)/Homer(0.730)<br><a href="#">More Information</a>   <a href="#">Similar Motifs Found</a> | <a href="#">motif file (matrix)</a> |

## Homer de novo Motif Results (E2APBX1Motif/)

[Known Motif Enrichment Results](#)

[Gene Ontology Enrichment Results](#)

If Homer is having trouble matching a motif to a known motif, try copy/pasting the matrix file into [STAMP](#)

More information on motif finding results: [HOMER](#) | [Description of Results](#) | [Tips](#)

Total target sequences = 9097

Total background sequences = 40330

\* - possible false positive

| Rank | Motif                                                                               | P-value | log P-value | % of Targets | % of Background | STD(Bg STD)     | Best Match/Details                                                                                                                       | Motif File                          |
|------|-------------------------------------------------------------------------------------|---------|-------------|--------------|-----------------|-----------------|------------------------------------------------------------------------------------------------------------------------------------------|-------------------------------------|
| 1    |    | 1e-826  | -1.904e+03  | 45.52%       | 17.52%          | 74.8bp (93.3bp) | RUNX1(Runt)/Jurkat-RUNX1-ChIP-Seq(GSE29180)/Homer(0.930)<br><a href="#">More Information</a>   <a href="#">Similar Motifs Found</a>      | <a href="#">motif file (matrix)</a> |
| 2    |    | 1e-803  | -1.851e+03  | 29.40%       | 7.76%           | 74.5bp (92.3bp) | EBF(EBF)/proBcell-EBF-ChIP-Seq(GSE21978)/Homer(0.963)<br><a href="#">More Information</a>   <a href="#">Similar Motifs Found</a>         | <a href="#">motif file (matrix)</a> |
| 3    |    | 1e-489  | -1.128e+03  | 38.18%       | 17.23%          | 78.3bp (94.6bp) | Ascl1(bHLH)/NeuralTubes-Ascl1-ChIP-Seq(GSE55840)/Homer(0.963)<br><a href="#">More Information</a>   <a href="#">Similar Motifs Found</a> | <a href="#">motif file (matrix)</a> |
| 4    |    | 1e-452  | -1.041e+03  | 32.05%       | 13.45%          | 77.1bp (93.3bp) | Etv2(ETS)/ES-ER71-ChIP-Seq(GSE59402)/Homer(0.967)(0.960)<br><a href="#">More Information</a>   <a href="#">Similar Motifs Found</a>      | <a href="#">motif file (matrix)</a> |
| 5    |    | 1e-197  | -4.553e+02  | 18.52%       | 8.51%           | 80.3bp (87.8bp) | Mef2a(MADS)/HL1-Mef2a.biotin-ChIP-Seq(GSE21529)/Homer(0.968)<br><a href="#">More Information</a>   <a href="#">Similar Motifs Found</a>  | <a href="#">motif file (matrix)</a> |
| 6    |    | 1e-181  | -4.173e+02  | 33.78%       | 20.78%          | 83.1bp (94.2bp) | BMYB(HTH)/Hela-BMYB-ChIP-Seq(GSE27030)/Homer(0.932)<br><a href="#">More Information</a>   <a href="#">Similar Motifs Found</a>           | <a href="#">motif file (matrix)</a> |
| 7    |    | 1e-132  | -3.042e+02  | 33.35%       | 22.14%          | 80.1bp (92.4bp) | PBX1/MA0070.1/Jaspar(0.864)<br><a href="#">More Information</a>   <a href="#">Similar Motifs Found</a>                                   | <a href="#">motif file (matrix)</a> |
| 8    |  | 1e-89   | -2.052e+02  | 59.38%       | 48.88%          | 83.7bp (92.9bp) | MF0002.1_bZIP_CREB/G-box-like_subclass/Jaspar(0.863)<br><a href="#">More Information</a>   <a href="#">Similar Motifs Found</a>          | <a href="#">motif file (matrix)</a> |
| 9    |  | 1e-71   | -1.642e+02  | 2.63%        | 0.63%           | 73.2bp (93.0bp) | PB0040.1_Lef1_1/Jaspar(0.913)<br><a href="#">More Information</a>   <a href="#">Similar Motifs Found</a>                                 | <a href="#">motif file (matrix)</a> |
| 10   |  | 1e-69   | -1.597e+02  | 40.47%       | 31.67%          | 83.7bp (93.0bp) | Myb/MA0100.2/Jaspar(0.701)<br><a href="#">More Information</a>   <a href="#">Similar Motifs Found</a>                                    | <a href="#">motif file (matrix)</a> |
| 11   |  | 1e-67   | -1.548e+02  | 18.07%       | 11.80%          | 80.2bp (93.1bp) | Pax6/MA0069.1/Jaspar(0.769)<br><a href="#">More Information</a>   <a href="#">Similar Motifs Found</a>                                   | <a href="#">motif file (matrix)</a> |
| 12   |  | 1e-65   | -1.516e+02  | 6.63%        | 3.05%           | 81.9bp (94.4bp) | IRF1(IRF)/PBMC-IRF1-ChIP-Seq(GSE43036)/Homer(0.817)<br><a href="#">More Information</a>   <a href="#">Similar Motifs Found</a>           | <a href="#">motif file (matrix)</a> |
| 13   |  | 1e-50   | -1.170e+02  | 11.72%       | 7.28%           | 81.8bp (94.8bp) | Pax6/MA0069.1/Jaspar(0.719)<br><a href="#">More Information</a>   <a href="#">Similar Motifs Found</a>                                   | <a href="#">motif file (matrix)</a> |
| 14   |  | 1e-46   | -1.072e+02  | 15.72%       | 10.76%          | 84.9bp (90.7bp) | E2F4/MA0470.1/Jaspar(0.761)<br><a href="#">More Information</a>   <a href="#">Similar Motifs Found</a>                                   | <a href="#">motif file (matrix)</a> |
| 15   |  | 1e-38   | -8.935e+01  | 7.62%        | 4.50%           | 82.0bp (86.5bp) | PB0171.1_Sox18_2/Jaspar(0.722)<br><a href="#">More Information</a>   <a href="#">Similar Motifs Found</a>                                | <a href="#">motif file (matrix)</a> |
| 16   |  | 1e-29   | -6.747e+01  | 15.40%       | 11.44%          | 84.0bp (91.0bp) | Barhl1/MA0877.1/Jaspar(0.766)<br><a href="#">More Information</a>   <a href="#">Similar Motifs Found</a>                                 | <a href="#">motif file (matrix)</a> |
| 17   |  | 1e-15   | -3.612e+01  | 0.19%        | 0.01%           | 74.8bp (55.7bp) | ESRRB/MA0141.3/Jaspar(0.680)<br><a href="#">More Information</a>   <a href="#">Similar Motifs Found</a>                                  | <a href="#">motif file (matrix)</a> |

|      |                                                                                   |       |            |       |       |                    |                                                                                                                                 |                                     |
|------|-----------------------------------------------------------------------------------|-------|------------|-------|-------|--------------------|---------------------------------------------------------------------------------------------------------------------------------|-------------------------------------|
| 18   |  | 1e-13 | -2.996e+01 | 0.13% | 0.01% | 77.2bp<br>(37.0bp) | TAL1::TCF3/MA0091.1/Jaspar(0.644)<br><a href="#">More Information</a>   <a href="#">Similar Motifs</a><br><a href="#">Found</a> | <a href="#">motif file (matrix)</a> |
| 19 * |  | 1e-7  | -1.696e+01 | 0.11% | 0.01% | 56.3bp<br>(64.8bp) | Mecom/MA0029.1/Jaspar(0.652)<br><a href="#">More Information</a>   <a href="#">Similar Motifs</a><br><a href="#">Found</a>      | <a href="#">motif file (matrix)</a> |
| 20 * |  | 1e-7  | -1.693e+01 | 0.10% | 0.01% | 60.0bp<br>(66.2bp) | CRE(bZIP)/Promoter/Homer(0.745)<br><a href="#">More Information</a>   <a href="#">Similar Motifs</a><br><a href="#">Found</a>   | <a href="#">motif file (matrix)</a> |
| 21 * |  | 1e-3  | -8.636e+00 | 1.73% | 1.28% | 81.6bp<br>(89.1bp) | PB0140.1_Irf6_2/Jaspar(0.633)<br><a href="#">More Information</a>   <a href="#">Similar Motifs</a><br><a href="#">Found</a>     | <a href="#">motif file (matrix)</a> |

## Homer *de novo* Motif Results (PBX1C\_motif/)

[Known Motif Enrichment Results](#)

[Gene Ontology Enrichment Results](#)

If Homer is having trouble matching a motif to a known motif, try copy/pasting the matrix file into [STAMP](#)

More information on motif finding results: [HOMER](#) | [Description of Results](#) | [Tips](#)

Total target sequences = 15681

Total background sequences = 33577

\* - possible false positive

| Rank | Motif | P-value | log P-value | % of Targets | % of Background | STD(Bg STD)     | Best Match/Details                                                                                                                           | Motif File                          |
|------|-------|---------|-------------|--------------|-----------------|-----------------|----------------------------------------------------------------------------------------------------------------------------------------------|-------------------------------------|
| 1    |       | 1e-726  | -1.673e+03  | 37.46%       | 17.90%          | 78.9bp (91.4bp) | Fli1(ETS)/CD8-FLI-ChIP-Seq(GSE20898)/Homer(0.981)<br><a href="#">More Information</a>   <a href="#">Similar Motifs Found</a>                 | <a href="#">motif file (matrix)</a> |
| 2    |       | 1e-579  | -1.335e+03  | 33.89%       | 16.88%          | 78.1bp (91.2bp) | RUNX1(Runt)/Jurkat-RUNX1-ChIP-Seq(GSE29180)/Homer(0.977)<br><a href="#">More Information</a>   <a href="#">Similar Motifs Found</a>          | <a href="#">motif file (matrix)</a> |
| 3    |       | 1e-414  | -9.542e+02  | 8.98%        | 2.21%           | 71.2bp (91.9bp) | Pbx3(Homeobox)/GM12878-PBX3-ChIP-Seq(GSE32465)/Homer(0.977)<br><a href="#">More Information</a>   <a href="#">Similar Motifs Found</a>       | <a href="#">motif file (matrix)</a> |
| 4    |       | 1e-362  | -8.357e+02  | 12.29%       | 4.28%           | 77.0bp (85.9bp) | EBF(EBF)/proBecl1-EBF-ChIP-Seq(GSE21978)/Homer(0.967)<br><a href="#">More Information</a>   <a href="#">Similar Motifs Found</a>             | <a href="#">motif file (matrix)</a> |
| 5    |       | 1e-237  | -5.459e+02  | 31.68%       | 20.47%          | 84.1bp (93.1bp) | BMYB(HTH)/Hela-BMYB-ChIP-Seq(GSE27030)/Homer(0.887)<br><a href="#">More Information</a>   <a href="#">Similar Motifs Found</a>               | <a href="#">motif file (matrix)</a> |
| 6    |       | 1e-229  | -5.287e+02  | 44.70%       | 32.29%          | 81.6bp (91.6bp) | E2A(bHLH)/proBecl1-E2A-ChIP-Seq(GSE21978)/Homer(0.953)<br><a href="#">More Information</a>   <a href="#">Similar Motifs Found</a>            | <a href="#">motif file (matrix)</a> |
| 7    |       | 1e-171  | -3.953e+02  | 52.81%       | 41.70%          | 84.4bp (92.9bp) | POL007.1_BREd/Jaspar(0.607)<br><a href="#">More Information</a>   <a href="#">Similar Motifs Found</a>                                       | <a href="#">motif file (matrix)</a> |
| 8    |       | 1e-161  | -3.728e+02  | 11.24%       | 5.61%           | 79.0bp (89.1bp) | NFY(CCAAT)/Promoter/Homer(0.911)<br><a href="#">More Information</a>   <a href="#">Similar Motifs Found</a>                                  | <a href="#">motif file (matrix)</a> |
| 9    |       | 1e-161  | -3.723e+02  | 47.59%       | 36.97%          | 84.4bp (94.3bp) | POL010.1_DCE_S_III/Jaspar(0.721)<br><a href="#">More Information</a>   <a href="#">Similar Motifs Found</a>                                  | <a href="#">motif file (matrix)</a> |
| 10   |       | 1e-155  | -3.574e+02  | 52.22%       | 41.67%          | 85.1bp (93.4bp) | REL/MA0101.1/Jaspar(0.619)<br><a href="#">More Information</a>   <a href="#">Similar Motifs Found</a>                                        | <a href="#">motif file (matrix)</a> |
| 11   |       | 1e-129  | -2.972e+02  | 63.65%       | 54.09%          | 84.8bp (91.7bp) | Tcf3(HMG)/mES-Tcf3-ChIP-Seq(GSE11724)/Homer(0.632)<br><a href="#">More Information</a>   <a href="#">Similar Motifs Found</a>                | <a href="#">motif file (matrix)</a> |
| 12   |       | 1e-123  | -2.849e+02  | 17.68%       | 11.26%          | 80.0bp (90.3bp) | Pax8(PairedHomeobox)/Thyroid-Pax8-ChIP-Seq(GSE26938)/Homer(0.763)<br><a href="#">More Information</a>   <a href="#">Similar Motifs Found</a> | <a href="#">motif file (matrix)</a> |
| 13   |       | 1e-109  | -2.524e+02  | 13.72%       | 8.38%           | 81.2bp (87.7bp) | SP2/MA0516.1/Jaspar(0.950)<br><a href="#">More Information</a>   <a href="#">Similar Motifs Found</a>                                        | <a href="#">motif file (matrix)</a> |
| 14   |       | 1e-106  | -2.456e+02  | 26.80%       | 19.54%          | 82.6bp (95.9bp) | Pax2/MA0067.1/Jaspar(0.792)<br><a href="#">More Information</a>   <a href="#">Similar Motifs Found</a>                                       | <a href="#">motif file (matrix)</a> |
| 15   |       | 1e-102  | -2.359e+02  | 5.42%        | 2.37%           | 81.9bp (85.5bp) | MEF2A/MA0052.3/Jaspar(0.908)<br><a href="#">More Information</a>   <a href="#">Similar Motifs Found</a>                                      | <a href="#">motif file (matrix)</a> |
| 16   |       | 1e-85   | -1.980e+02  | 1.45%        | 0.28%           | 78.8bp (85.9bp) | Tcf4(HMG)/Het116-Tcf4-ChIP-Seq(SRA012054)/Homer(0.849)<br><a href="#">More Information</a>   <a href="#">Similar Motifs Found</a>            | <a href="#">motif file (matrix)</a> |
| 17   |       | 1e-76   | -1.773e+02  | 22.11%       | 16.37%          | 85.8bp (91.5bp) | Nkx6.1(Homeobox)/Islet-Nkx6.1-ChIP-Seq(GSE40975)/Homer(0.719)<br><a href="#">More Information</a>   <a href="#">Similar Motifs Found</a>     | <a href="#">motif file (matrix)</a> |

|    |                                                                                   |       |            |        |        |                    |                                                                                                                            |                                     |
|----|-----------------------------------------------------------------------------------|-------|------------|--------|--------|--------------------|----------------------------------------------------------------------------------------------------------------------------|-------------------------------------|
| 18 |  | 1e-71 | -1.640e+02 | 25.76% | 19.86% | 84.7bp<br>(91.7bp) | E2F(E2F)/Hela-CellCycle-Expression/Homer(0.751)<br><a href="#">More Information</a>   <a href="#">Similar Motifs Found</a> | <a href="#">motif file (matrix)</a> |
| 19 |  | 1e-56 | -1.297e+02 | 3.72%  | 1.79%  | 80.6bp<br>(88.4bp) | NRF(NRF)/Promoter/Homer(0.909)<br><a href="#">More Information</a>   <a href="#">Similar Motifs Found</a>                  | <a href="#">motif file (matrix)</a> |
| 20 |  | 1e-49 | -1.129e+02 | 4.22%  | 2.26%  | 85.8bp<br>(90.1bp) | FOS/MA0476.1/Jaspar(0.973)<br><a href="#">More Information</a>   <a href="#">Similar Motifs Found</a>                      | <a href="#">motif file (matrix)</a> |
| 21 |  | 1e-42 | -9.733e+01 | 3.34%  | 1.73%  | 83.1bp<br>(84.8bp) | PB0166.1_Sox12_2/Jaspar(0.714)<br><a href="#">More Information</a>   <a href="#">Similar Motifs Found</a>                  | <a href="#">motif file (matrix)</a> |
| 22 |  | 1e-32 | -7.422e+01 | 1.27%  | 0.48%  | 78.9bp<br>(85.6bp) | YY1(Zf)/Promoter/Homer(0.938)<br><a href="#">More Information</a>   <a href="#">Similar Motifs Found</a>                   | <a href="#">motif file (matrix)</a> |
| 23 |  | 1e-30 | -7.073e+01 | 1.60%  | 0.70%  | 80.7bp<br>(98.8bp) | GFX(?)/Promoter/Homer(0.920)<br><a href="#">More Information</a>   <a href="#">Similar Motifs Found</a>                    | <a href="#">motif file (matrix)</a> |
| 24 |  | 1e-21 | -5.055e+01 | 0.11%  | 0.01%  | 60.3bp<br>(75.2bp) | JUN/MA0488.1/Jaspar(0.691)<br><a href="#">More Information</a>   <a href="#">Similar Motifs Found</a>                      | <a href="#">motif file (matrix)</a> |
| 25 |  | 1e-21 | -4.950e+01 | 0.17%  | 0.01%  | 54.6bp<br>(63.6bp) | Sox3/MA0514.1/Jaspar(0.735)<br><a href="#">More Information</a>   <a href="#">Similar Motifs Found</a>                     | <a href="#">motif file (matrix)</a> |
| 26 |  | 1e-16 | -3.906e+01 | 0.16%  | 0.02%  | 88.1bp<br>(62.2bp) | PB0120.1_Foxj1_2/Jaspar(0.637)<br><a href="#">More Information</a>   <a href="#">Similar Motifs Found</a>                  | <a href="#">motif file (matrix)</a> |
